# Supplementary material for: Yeast Cell Wall Compounds on The Formation of Fermentation Products and Fecal Microbiota in Cats: An In Vivo and In Vitro Approach
Source: MDPI journal article supplement (doi:10.3390/ani13040637), 2023-02-11
Supplement: s1 [file s1]

Table S1: Fermentation products (mmol), gas volume (mL), and pH of in vitro experiment corrected for fecal DM (g) using different substrates and feces of cats of the experiment in vivo as inoculum.

|                | Blank   |         |         |         |        | Pectin  |         |         |         |        | Amino acids |         |         |         |        | Cellulose |         |         |         |        |
|----------------|---------|---------|---------|---------|--------|---------|---------|---------|---------|--------|-------------|---------|---------|---------|--------|-----------|---------|---------|---------|--------|
| Parameter      | Control | YWC-15  | YCW-30  | Mean    | SEM    | Control | YWC-15  | YCW-30  | Mean    | SEM    | Control     | YWC-15  | YCW-30  | Mean    | SEM    | Control   | YWC-15  | YCW-30  | Mean    | SEM    |
| Ammonia        | 3.34    | 3.60    | 3.67    | 3.537   | 0.102  | 2.92    | 2.99    | 2.72    | 2.879   | 0.081  | 7.44        | 7.53    | 7.16    | 7.374   | 0.112  | 3.83      | 4.18    | 3.72    | 3.909   | 0.137  |
| pH             | 6.41    | 6.38    | 6.37    | 6.386   | 0.012  | 6.11    | 6.09    | 6.08    | 6.094   | 0.007  | 6.43        | 6.39    | 6.38    | 6.403   | 0.015  | 6.40      | 6.35    | 6.38    | 6.375   | 0.014  |
| Gas volume     | 78.81   | 88.82   | 66.30   | 77.977  | 6.515  | 254.35  | 277.07  | 246.47  | 259.299 | 9.172  | 102.02      | 113.50  | 89.07   | 101.530 | 7.058  | 74.36     | 87.97   | 65.28   | 75.870  | 6.595  |
| Acetic         | 484.63  | 473.52  | 419.57  | 459.240 | 20.092 | 712.45  | 773.40  | 755.97  | 747.271 | 18.123 | 515.50      | 536.12  | 514.12  | 521.914 | 7.116  | 514.22    | 482.23  | 433.85  | 476.768 | 23.360 |
| Propionic      | 506.20  | 471.33  | 417.44  | 464.990 | 25.820 | 533.66  | 512.72  | 570.56  | 538.982 | 16.909 | 520.99      | 472.60  | 468.49  | 487.358 | 16.858 | 470.92    | 452.36  | 409.55  | 444.277 | 18.173 |
| Butiric        | 241.21  | 244.20  | 216.23  | 233.882 | 8.868  | 248.65  | 265.35  | 227.24  | 247.081 | 11.027 | 302.96      | 301.35  | 261.26  | 288.520 | 13.638 | 239.59    | 247.30  | 224.15  | 237.014 | 6.807  |
| SCFA Total     | 1232.04 | 1189.06 | 1053.24 | 1158.11 | 53.89  | 1494.77 | 1551.46 | 1553.78 | 1533.33 | 19.30  | 1339.44     | 1310.07 | 1243.87 | 1297.79 | 28.26  | 1224.73   | 1181.90 | 1067.55 | 1158.06 | 46.91  |
| Iso-butiric    | 226.86  | 229.64  | 214.20  | 223.564 | 4.751  | 269.96  | 285.75  | 274.83  | 276.848 | 4.669  | 228.22      | 242.66  | 223.43  | 231.436 | 5.780  | 228.54    | 235.59  | 217.46  | 227.196 | 5.275  |
| Isovaleric     | 228.67  | 225.97  | 208.55  | 221.065 | 6.306  | 241.62  | 234.90  | 216.49  | 231.006 | 7.512  | 265.23      | 262.04  | 231.98  | 253.085 | 10.591 | 225.16    | 229.51  | 213.89  | 222.855 | 4.654  |
| Valeric        | 236.88  | 231.99  | 217.55  | 228.806 | 5.804  | 230.03  | 228.75  | 213.43  | 224.070 | 5.332  | 301.92      | 302.96  | 268.47  | 291.118 | 11.328 | 230.64    | 234.55  | 231.95  | 232.381 | 1.149  |
| BCFA Total     | 692.41  | 687.60  | 640.30  | 673.43  | 16.63  | 741.62  | 749.40  | 704.75  | 731.92  | 13.77  | 795.38      | 807.66  | 723.88  | 775.64  | 26.12  | 684.34    | 699.65  | 663.31  | 682.43  | 10.53  |
| 4 metilvaleric | 31.24   | 27.97   | 29.58   | 29.595  | 0.946  | 34.28   | 28.61   | 31.01   | 31.298  | 1.644  | 37.10       | 36.72   | 33.73   | 35.850  | 1.066  | 30.85     | 30.29   | 29.98   | 30.374  | 0.256  |
| Hexanoico      | 29.91   | 26.93   | 21.56   | 26.133  | 2.445  | 24.86   | 24.95   | 21.46   | 23.756  | 1.150  | 29.49       | 28.03   | 22.31   | 26.609  | 2.189  | 24.55     | 23.92   | 21.33   | 23.267  | 0.985  |
| Heptanoic      | 222.96  | 224.13  | 205.42  | 217.503 | 6.052  | 219.51  | 223.05  | 204.72  | 215.759 | 5.615  | 220.97      | 224.89  | 204.04  | 216.635 | 6.400  | 220.51    | 223.02  | 203.80  | 215.777 | 6.034  |
